# Supplementary material for: Bottom Up Ethics - Neuroenhancement in Education and Employment
Source: Springer Nature journal article supplement (doi:10.1007/s12152-018-9366-7), 2018-05-01
Supplement: MOESM1 [file 12152_2018_9366_MOESM1_ESM.pdf]

Supplementary Table 1. Education and employment context regression coefficients of response variable “In the protagonist’s shoes, would you do the same?” for each participating country. Models include the 4 experimental manipulations represented as dummy variables, sociodemographic indicators, and SP and IP scales. \*  $p < 0.05$ ; \*\*  $p < 0.01$ ; \*\*\*  $p < 0.001$

| EDUCATION context                   |           |           |           |           |           |           |           |           |           |           |           |
|-------------------------------------|-----------|-----------|-----------|-----------|-----------|-----------|-----------|-----------|-----------|-----------|-----------|
|                                     | AT        | DK        | DE        | H         | IS        | IT        | NL        | PT        | ES        | UK        | US        |
| Constant                            | 2.460     | 4.393     | 3.801     | 3.985     | 2.302     | 2.135     | 3.570     | 1.251     | 1.606     | 4.018     | 1.312     |
| Male vs Female protagonist          |           |           |           |           |           |           |           |           |           |           |           |
| Pill vs device                      | -0.775*** | -0.448**  | -0.869*** |           |           |           |           | 0.526**   |           | -0.489**  |           |
| High vs low efficacy                | 0.609***  | 0.441**   |           |           | 0.435*    | 0.348*    | 0.376*    |           |           |           | 0.644***  |
| Good vs failing performance         |           |           | -0.373*   |           | -0.484**  |           |           |           | 0.368*    | -0.430**  |           |
| Female vs male respondent           |           |           |           |           |           |           | -0.410*   |           |           | -0.511**  | -0.396*   |
| 25-34 vs 18-24                      |           |           |           |           |           |           |           |           |           |           |           |
| 35-44 vs 18-24                      |           |           |           |           |           |           | -0.752*   |           |           | -0.863**  | -0.780*   |
| 45-54 vs 18-24                      |           |           |           |           |           |           |           |           |           |           | -0.974**  |
| 55+ vs 18-24                        |           | -0.926*** |           |           |           |           | -0.974*** |           | -0.887**  | -0.996*** | -1.257*** |
| Uni degree vs no degree             |           |           | -0.477*   |           |           | 0.457*    |           |           |           |           |           |
| Societal/Protective                 | -0.385*** | -0.584*** | -0.470*** | -0.540*** | -0.462*** | -0.474*** | -0.541*** | -0.453*** | -0.485*** | -0.579*** | -0.326*** |
| Individual/Proactionary             | 0.782***  | 0.678***  | 0.782***  | 0.656***  | 0.737***  | 0.790***  | 0.747***  | 0.721***  | 0.890***  | 0.866***  | 0.931***  |
| Explanatory power (R <sup>2</sup> ) | 0.270     | 0.298     | 0.299     | 0.253     | 0.260     | 0.343     | 0.293     | 0.193     | 0.311     | 0.394     | 0.325     |
| EMPLOYMENT context                  |           |           |           |           |           |           |           |           |           |           |           |
| Constant                            | 2.619     | 4.011     | 2.831     | 3.057     | 0.44      | 2.824     | 4.04      | 0.945     | 1.109     | 3.008     | 1.518     |
| Male vs Female protagonist          |           |           |           |           |           | -0.323*   |           |           |           |           |           |
| Pill vs device                      | -0.660*** |           |           |           |           | 0.822***  |           | 0.422*    |           |           |           |
| High vs low efficacy                |           | 0.326*    | 0.447**   |           | 0.389*    |           | 0.407**   |           |           | 0.350*    | 0.394*    |
| Good vs failing performance         |           |           |           |           | -0.445*   |           | -0.408*** | -0.395*   |           |           | -0.504**  |
| Female vs male respondent           |           | -0.640*** | -0.366*   |           |           |           | -0.503*** |           | -0.440**  | -0.454**  | -0.414*   |
| 25-34 vs 18-24                      |           |           |           |           |           |           |           |           |           |           |           |
| 35-44 vs 18-24                      |           | -0.953*** |           |           |           |           |           |           |           |           |           |
| 45-54 vs 18-24                      |           | -0.972*** |           |           |           |           |           |           |           |           |           |
| 55+ vs 18-24                        |           | -1.223*** |           |           |           |           | -0.718*   |           |           |           | -1.094*** |
| Uni degree vs no degree             |           |           |           |           |           |           |           |           |           | -0.558**  |           |
| Societal/Protective                 | -0.418*** | -0.517*** | -0.530*** | -0.481*** | -0.316*** | -0.546*** | -0.570*** | -0.459*** | -0.504*** | -0.474*** | -0.321*** |
| Individual/Proactionary             | 0.723***  | 0.676***  | 0.726***  | 0.618***  | 0.733***  | 0.742***  | 0.640***  | 0.827***  | -0.914*** | 0.746***  | 0.922***  |
| Explanatory power (R <sup>2</sup> ) | 0.264     | 0.333     | 0.308     | 0.232     | 0.233     | 0.350     | 0.290     | 0.240     | 0.344     | 0.308     | 0.319     |
